# Supplementary material for: Comparison of Outcomes after Arthroscopic Rotator Cuff Repair between Elderly and Younger Patient Groups: A Systematic Review and Meta-Analysis of Comparative Studies
Source: MDPI journal article supplement (doi:10.3390/diagnostics13101770), 2023-05-17
Supplement: s1 [file s1]

## Appendix 1. MEDLINE (Ovid) search strategy (13th Sep 2022)

- 1 shoulder/
- 2 rotator cuff/
- 3 1 or 2
- 4 calcium/
- 5 exp bursitis/
- 6 4 or 5
- 7 3 and 6
- 8 shoulder pain/
- 9 shoulder impingement syndrome/
- 10 rotator cuff injuries/
- 11 (rotator cuff or supraspinatus or infraspinatus or subscapular\$ or teres).tw.
- 12 ((shoulder\$ or subacromial or rotator cuff) adj5 (tendon\$ or tendin\$ or bursitis or calcium or calcif\$ or impinge\$ or tear\$ or pain)).tw.
- 13 or/7-12
- 14 exp Surgical Procedures, Operative/
- 15 su.fs.
- 16 (surger\$ or surgical\$ or operat\$).tw.
- 17 decompress\$.tw.
- 18 bursectom\$.tw.
- 19 acromioplast\$.tw.
- 20 (calcium adj remov\$).tw.
- 21 debrid\$.tw.
- 22 ARTHROSCOPY/
- 23 arthroscop\$.tw.
- 24 or/14-23
- 25 13 and 24
- 26 age. mp.
- 27 (seventy or "70").tw.
- 28 and/25-27 (818)

## Appendix 2 Embase (Elsevier) search strategy (13th Sep 2022)

#1 'shoulder'/exp  
#2 'rotator cuff'/exp  
#3 #1 or #2  
#4 'calcium'/exp  
#5 'bursitis'/exp  
#6 #4 or #5  
#7 #3 and #6  
#8 'shoulder pain'  
#9 'shoulder impingement syndrome'/exp  
#10 'rotator cuff injury'/exp  
#11 (rotator cuff or supraspinatus or infraspinatus or subscapular\$ or teres):ab,ti  
#12 (shoulder\$ or subacromial or 'rotator cuff') NEAR/5 (tendon\$ or tendin\$ or bursitis or calcium or calcif\$ or impinge\$ or tear\$ or pain)  
#13 #7 OR #8 OR #9 OR #10 OR #11 OR #12  
#14 'surgery'/exp  
#15 (surger\$ or surgical\$ or operat\$):ab,ti  
#16 decompress\$:ab,ti  
#17 bursectom\$:ab,ti  
#18 acromioplast\$:ab,ti  
#19 (calcium NEXT/10 remov\$):ab,ti  
#20 'debridement'  
#21 debrid\$:ab,ti  
#22 'shoulder arthroscopy'/  
#23 arthroscop\$:ab,ti  
#24 #14 OR #15 OR #16 OR #17 OR #18 OR #19 OR #20 OR #21 OR #22 OR #23  
#25 #13 and #24  
#26 'age'  
#27 seventy or 70  
#28 #25 and #26 and #27  
#29 #28 AND [embase]/lim NOT ([embase]/lim AND [medline]/lim) (301)

### Appendix 3. CENTRAL (Cochrane Library) search strategy (13th Sep 2022)

- #1 MeSH descriptor: [Shoulder] this term only
- #2 MeSH descriptor: [Rotator Cuff] this term only
- #3 #1 or #2
- #4 MeSH descriptor: [Calcium] this term only
- #5 MeSH descriptor: [Bursitis] 1 tree(s) exploded
- #6 #4 or #5
- #7 #3 and #6
- #8 MeSH descriptor: [Shoulder Pain] this term only
- #9 MeSH descriptor: [Shoulder Impingement Syndrome] this term only
- #10 MeSH descriptor: [Rotator Cuff Injuries] this term only
- #11 rotator cuff:ti,ab or supraspinatus:ti,ab or infraspinatus:ti,ab or subscapular\*:ti,ab or teres:ti,ab
- #12 ((shoulder\*:ti,ab or subacromial:ti,ab or rotator cuff:ti,ab) near/5 (tendon\*:ti,ab or tendin\*:ti,ab or bursitis:ti,ab or calcium:ti,ab or calcif\*:ti,ab or impinge\*:ti,ab or tear\*:ti,ab or pain:ti,ab))
- #13 #7 or #8 or #9 or #10 or #11 or #12
- #14 MeSH descriptor: [Surgical Procedures, Operative] explode all trees
- #15 (surger\*:ti,ab or surgical\*:ti,ab or operat\*:ti,ab)
- #16 decompress\*:ti,ab
- #17 bursectom\*:ti,ab
- #18 acromioplast\*:ti,ab
- #19 (calcium:ti,ab next remov\*:ti,ab)
- #20 debrid\*:ti,ab
- #21 MeSH descriptor: [Arthroscopy] this term only
- #22 arthroscop\*:ti,ab
- #23 #14 or #15 or #16 or #17 or #18 or #19 or #20 or #21 or #22
- #24 #13 and #23
- #25 age\*:ti,ab
- #26 (seventy or "70"):ab,ti
- #27 #24 and #25 and #26 (127)
- #28 #27 (Trials) 124

818+301+124→ 1185 (58 duplicate)
