# Supplementary material for: Comparison of Outcomes after Arthroscopic Rotator Cuff Repair between Elderly and Younger Patient Groups: A Systematic Review and Meta-Analysis of Comparative Studies
Source: MDPI journal article supplement (doi:10.3390/diagnostics13101770), 2023-05-17
Supplement: s1 [file s1]

**File S2. Excluded studies with reasons**

| <b>Study</b>        | <b>Reference</b>                                                                                                                                                                                                                                          | <b>Reasons for exclusion</b>     |
|---------------------|-----------------------------------------------------------------------------------------------------------------------------------------------------------------------------------------------------------------------------------------------------------|----------------------------------|
| Worland<br>1999     | Repair of massive rotator cuff tears in patients older than 70 years<br><a href="https://pubmed.ncbi.nlm.nih.gov/10077792/">https://pubmed.ncbi.nlm.nih.gov/10077792/</a>                                                                                 | Case series                      |
| Charousset<br>2010  | Arthroscopic repair of full-thickness rotator cuff tears: is there tendon healing in patients aged 65 years or older?<br><a href="https://pubmed.ncbi.nlm.nih.gov/20206038/">https://pubmed.ncbi.nlm.nih.gov/20206038/</a>                                | Case series                      |
| Verma 2010          | Outcomes of arthroscopic rotator cuff repair in patients aged 70 years or older<br><a href="https://pubmed.ncbi.nlm.nih.gov/20729024/">https://pubmed.ncbi.nlm.nih.gov/20729024/</a>                                                                      | Case series                      |
| Cozzolino<br>2012   | Outcome of single tendon rotator cuff repair in patients older than 65 years<br><a href="https://pubmed.ncbi.nlm.nih.gov/22743069/">https://pubmed.ncbi.nlm.nih.gov/22743069/</a>                                                                         | Conference abstract, case series |
| De Carvalho<br>2012 | Open rotator cuff repairs in patients 70 years and older<br><a href="https://pubmed.ncbi.nlm.nih.gov/22519638/">https://pubmed.ncbi.nlm.nih.gov/22519638/</a>                                                                                             | case series                      |
| Djahangir<br>2013   | Outcome of single-tendon rotator cuff repair in patients aged older than 65 years<br><a href="https://pubmed.ncbi.nlm.nih.gov/22743069/">https://pubmed.ncbi.nlm.nih.gov/22743069/</a>                                                                    | case series                      |
| Flurin 2013a        | Rotator cuff tears after 70 years of age: a prospective, randomized, comparative study between decompression and arthroscopic repair in 154 patients<br><a href="https://pubmed.ncbi.nlm.nih.gov/24211128/">https://pubmed.ncbi.nlm.nih.gov/24211128/</a> | Not planned comparison           |
| Flurin 2013b        | Arthroscopic repair of the rotator cuff: prospective study of tendon healing after 70 years of age in 145 patients<br><a href="https://pubmed.ncbi.nlm.nih.gov/24200997/">https://pubmed.ncbi.nlm.nih.gov/24200997/</a>                                   | Not planned comparison           |
| Robinson<br>2013    | Rotator cuff repair in patients over 70 years of age: early outcomes and risk factors associated with re-tear<br><a href="https://pubmed.ncbi.nlm.nih.gov/23365029/">https://pubmed.ncbi.nlm.nih.gov/23365029/</a>                                        | Case series                      |
| Bhatia 2015a        | Two-year outcomes following arthroscopic rotator cuff repair in recreational athletes over 70 years of age                                                                                                                                                | Conference abstract, case series |
| Bhatia 2015b        | Two-Year Outcomes After Arthroscopic Rotator                                                                                                                                                                                                              | Conference abstract, case        |

|                   |                                                                                                                                                                                                                                 |                        |
|-------------------|---------------------------------------------------------------------------------------------------------------------------------------------------------------------------------------------------------------------------------|------------------------|
|                   | Cuff Repair in Recreational Athletes Older Than 70 Years<br><a href="https://pubmed.ncbi.nlm.nih.gov/25834140/">https://pubmed.ncbi.nlm.nih.gov/25834140/</a>                                                                   | series                 |
| Bhatia 2015c      | Two-year outcomes following arthroscopic rotator cuff repair in recreational athletes over 70 years of age<br><a href="https://pubmed.ncbi.nlm.nih.gov/25834140/">https://pubmed.ncbi.nlm.nih.gov/25834140/</a>                 | Case series            |
| De Castro 2015    | Rotator cuff injury in patients over the age of 65 years: evaluation of function, integrity and strength<br><a href="https://pubmed.ncbi.nlm.nih.gov/26229937/">https://pubmed.ncbi.nlm.nih.gov/26229937/</a>                   | Case series            |
| Miyazaki 2015     | Evaluation of the results from arthroscopic surgical treatment of rotator cuff injuries in patients aged 65 years and over<br><a href="https://pubmed.ncbi.nlm.nih.gov/26229935/">https://pubmed.ncbi.nlm.nih.gov/26229935/</a> | Case series            |
| Silva 2017        | Surgical Treatment of Rotator Cuff Tears After 65 Years of Age: A Systematic Review<br><a href="https://pubmed.ncbi.nlm.nih.gov/28555558/">https://pubmed.ncbi.nlm.nih.gov/28555558/</a>                                        | Review                 |
| Kwon 2019         | The Rotator Cuff Healing Index: A New Scoring System to Predict Rotator Cuff Healing After Surgical Repair<br><a href="https://pubmed.ncbi.nlm.nih.gov/30485753/">https://pubmed.ncbi.nlm.nih.gov/30485753/</a>                 | irrelevant             |
| Witney-Lagen 2019 | Do elderly patients gain as much benefit from arthroscopic rotator cuff repair as their younger peers?<br><a href="https://pubmed.ncbi.nlm.nih.gov/30704915/">https://pubmed.ncbi.nlm.nih.gov/30704915/</a>                     | Not planned comparison |
| Altintas 2020     | Repair of Rotator Cuff Tears in the Elderly: Does It Make Sense? A Systematic Review<br><a href="https://pubmed.ncbi.nlm.nih.gov/31038992/">https://pubmed.ncbi.nlm.nih.gov/31038992/</a>                                       | Review                 |
| Stone 2020        | Midterm outcomes of arthroscopic rotator cuff repair in patients aged 75 years and older<br><a href="https://pubmed.ncbi.nlm.nih.gov/32088076/">https://pubmed.ncbi.nlm.nih.gov/32088076/</a>                                   | Case series            |
