# Supplementary material for: Comparison of Outcomes after Arthroscopic Rotator Cuff Repair between Elderly and Younger Patient Groups: A Systematic Review and Meta-Analysis of Comparative Studies
Source: MDPI journal article supplement (doi:10.3390/diagnostics13101770), 2023-05-17
Supplement: s1 [file s1]

**File S3** Quality of included studies

|                            | Selection                                      |                                           |                              |                                                                                      | Comparability                                                                             | Outcome                           |                                                              |                                           | Total |
|----------------------------|------------------------------------------------|-------------------------------------------|------------------------------|--------------------------------------------------------------------------------------|-------------------------------------------------------------------------------------------|-----------------------------------|--------------------------------------------------------------|-------------------------------------------|-------|
| Cohort studies             |                                                |                                           |                              |                                                                                      |                                                                                           |                                   |                                                              |                                           |       |
| Study<br>(author,<br>year) | Representativeness<br>of the exposed<br>cohort | Selection of the<br>non-exposed<br>cohort | Ascertainment<br>of exposure | Demonstration<br>that outcome<br>of interest was<br>not present at<br>start of study | Comparability<br>of cases and<br>controls on the<br>basis of the<br>design or<br>analysis | Assessment<br>of outcome          | Was follow-up<br>long enough for<br>outcomes to<br>occur     | Adequacy<br>of follow<br>up of<br>cohorts |       |
| Osti,<br>2010*             | ✱                                              | ✱                                         | ✱                            | ✱                                                                                    | ✱                                                                                         | --                                | ✱                                                            | ✱                                         | 7     |
| Rhee,<br>2014*             | ✱                                              | ✱                                         | ✱                            | ✱                                                                                    | ✱                                                                                         | --                                | ✱                                                            | ✱                                         | 7     |
| Moraiti,<br>2015*          | ✱                                              | ✱                                         | ✱                            | ✱                                                                                    | ✱                                                                                         | --                                | ✱                                                            | ✱                                         | 7     |
| Nicloson,<br>2019*         | ✱                                              | ✱                                         | ✱                            | ✱                                                                                    | ✱                                                                                         | --                                | ✱                                                            | ✱                                         | 7     |
| Case-control study         |                                                |                                           |                              |                                                                                      |                                                                                           |                                   |                                                              |                                           |       |
|                            | Selection                                      |                                           |                              |                                                                                      | Comparability                                                                             | Exposure                          |                                                              |                                           | Total |
|                            | Is the case<br>definition<br>adequate?         | Representative-<br>ness of the<br>cases   | Selection of<br>Controls     | Definition of<br>Controls                                                            | Comparability<br>of cases and<br>controls on the<br>basis of the<br>design or<br>analysis | Ascertain-<br>ment of<br>exposure | Same method of<br>ascertainment<br>for cases and<br>controls | Non-<br>Response<br>rate                  |       |
| Gwark,<br>2018**           | ✱                                              | ✱                                         | --                           | ✱                                                                                    | ✱ ✱                                                                                       | ✱                                 | ✱                                                            | --                                        | 7     |

\*Quality assessed by Newcastle-Ottawa quality assessment scale for cohort study

\*\* Quality assessed by Newcastle-Ottawa quality assessment scale for case-control study
